# Supplementary material for: The role of microstructure in the thermal fatigue of solder joints
Source: PubMed Central journal article supplement (PMC11106336; doi:10.1038/s41467-024-48532-6), 2024-05-20
Supplement: 41467_2024_48532_MOESM1_ESM.pdf [file 41467_2024_48532_MOESM1_ESM.pdf]

## Supplementary Information

### The role of microstructure in the thermal fatigue of solder joints

J.W. Xian<sup>1,2\*</sup>, Y.L. Xu<sup>1,3\*</sup>, S. Stoyanov<sup>4</sup>, R.J. Coyle<sup>5</sup>, F.P.E. Dunne<sup>1</sup>, C.M. Gourlay<sup>1\*</sup>

<sup>1</sup>*Department of Materials, Imperial College London, SW7 2AZ, London, United Kingdom*

<sup>2</sup>*School of Materials Science and Engineering, Dalian University of Technology, Dalian 116024, China*

<sup>3</sup>*Institute of High Performance Computing (IHPC), Agency for Science, Technology and Research (A\*STAR), 1 Fusionopolis Way, #16-16 Connexis, Singapore 138632, Republic of Singapore*

<sup>4</sup>*School of Computing and Mathematical Sciences, University of Greenwich, SE10 9LS, London, United Kingdom*

<sup>5</sup>*Nokia Bell Labs, Murray Hill, New Jersey, USA*

### The frequency of occurrence of $\beta$ -Sn microstructure types:

Supplementary Table 1  $\beta$ -Sn microstructure types in the 84CTBGA packages at time zero (as soldered) and after 7580 thermal cycles from 0/100 °C. Different packages were analysed at time zero and after thermal cycling.

|                  | Number of joints | Single grain | Multigrain  |             |             |
|------------------|------------------|--------------|-------------|-------------|-------------|
|                  |                  |              | single ring | double ring | independent |
| Time zero        | 20               | 5 (25%)      | 13 (65%)    | 2 (10%)     | 0 (0%)      |
| Thermally cycled | 84               | 16 (19%)     | 50 (60%)    | 15 (18%)    | 3 (4%)      |

## Similarity of intermetallic particle size among joints:

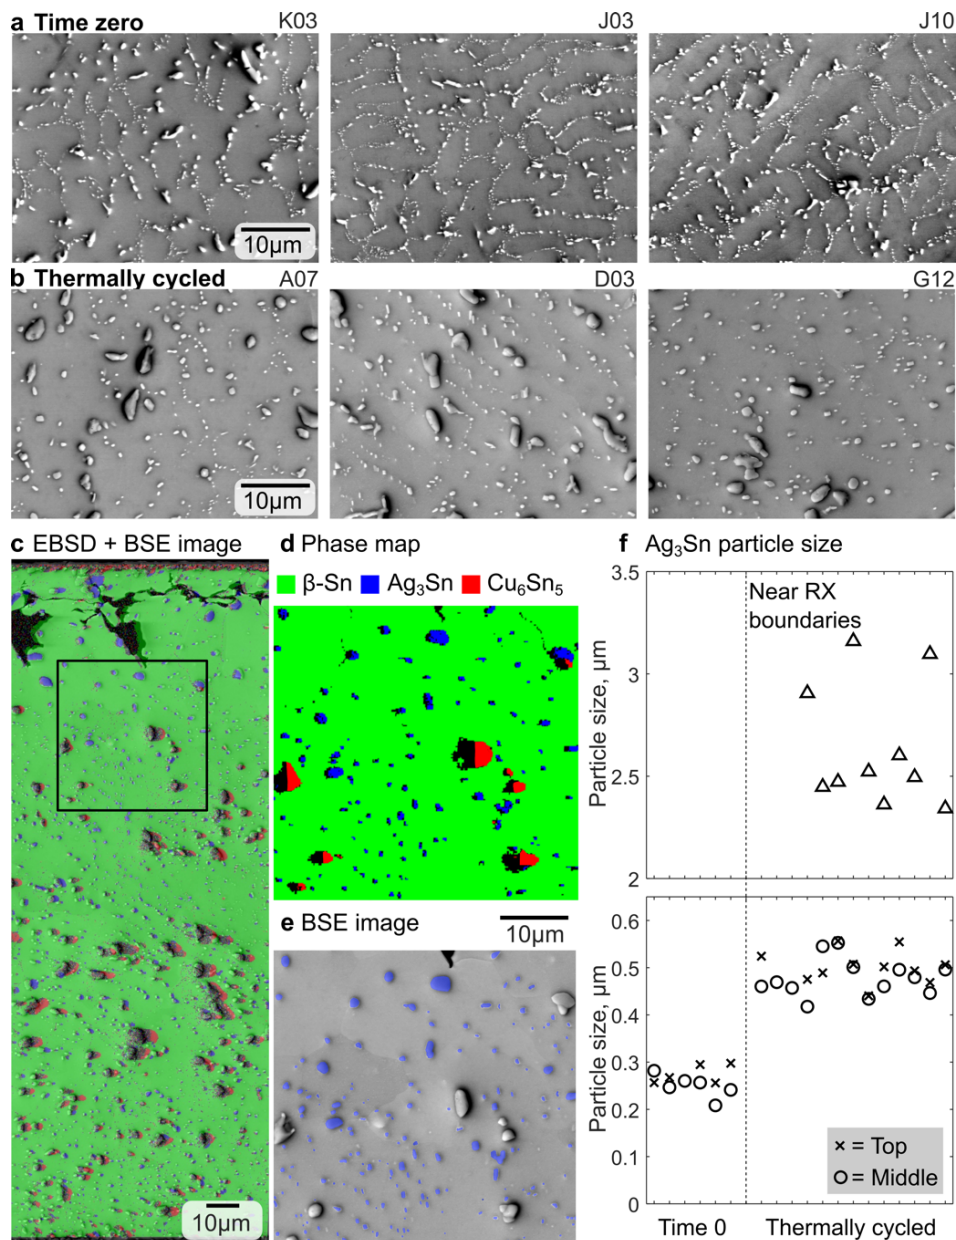

Supplementary Figure 1 Variability in eutectic  $\text{Ag}_3\text{Sn}$  particle size. a-b) BSE images taken from the middle regions of the joints in Figure 2 at time-zero and after thermal cycling respectively, c) an EBSD phase map from bottom to top of joint D03 overlaid on a BSE image, d) a cut-out from the black box, e) the BSE image with segmented  $\text{Ag}_3\text{Sn}$  particles indicated in blue. F)  $\text{Ag}_3\text{Sn}$  particle size measurements from segmented images. 6 time zero joints were measured yielding an  $\text{Ag}_3\text{Sn}$  particle size of  $0.26 \pm 0.03 \mu\text{m}$  (mean  $\pm$  standard deviation) across both the middle (circle symbols) and top (cross symbols) locations of the solder joints. 13 thermally cycled joints were measured yielding a  $\text{Ag}_3\text{Sn}$  particle size of  $0.49 \pm 0.04 \mu\text{m}$  in the middle and top regions away from the localised strain/damage. Triangle symbols indicate the mean size of  $\text{Ag}_3\text{Sn}$  in recrystallised regions (See Fig. 4 in the main paper) in the same thermally cycled joints. Compared with the strong variability in tin grain structure reported in the main paper, the  $\text{Ag}_3\text{Sn}$  particle size is similar among time zero joints and similar among thermally cycled joints.

## Comparison of macro-scale models: Chaboche+Garofalo model vs. Anand model:

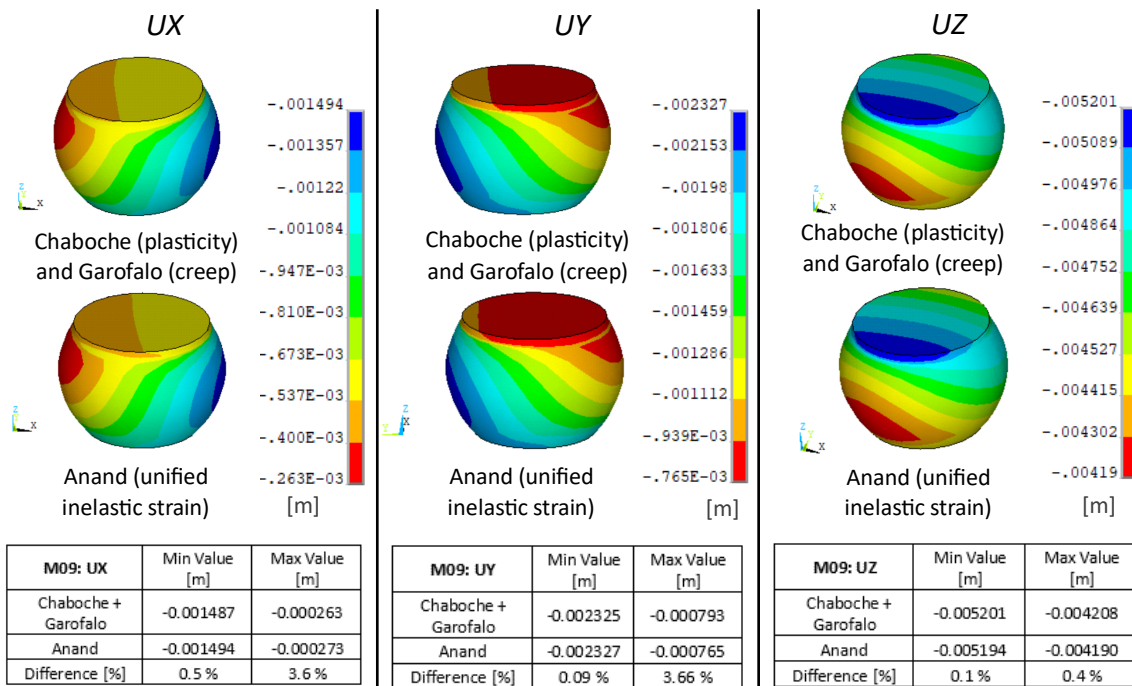

Supplementary Figure 2 Solder joint M09 contour plots of displacement ( $UX$ ,  $UY$  and  $UZ$ ) at the high-temperature extreme of the thermal cycle ( $100^{\circ}\text{C}$ ) predicted under two different setups for the Sn-3.0Ag-0.5Cu material behaviour: (1) Chaboche (kinematic hardening rule) and Garofalo (creep), and (2) Anand viscoplastic model. Peak values of displacements and their percentage differences with the two model setups are tabulated under the contour plots.

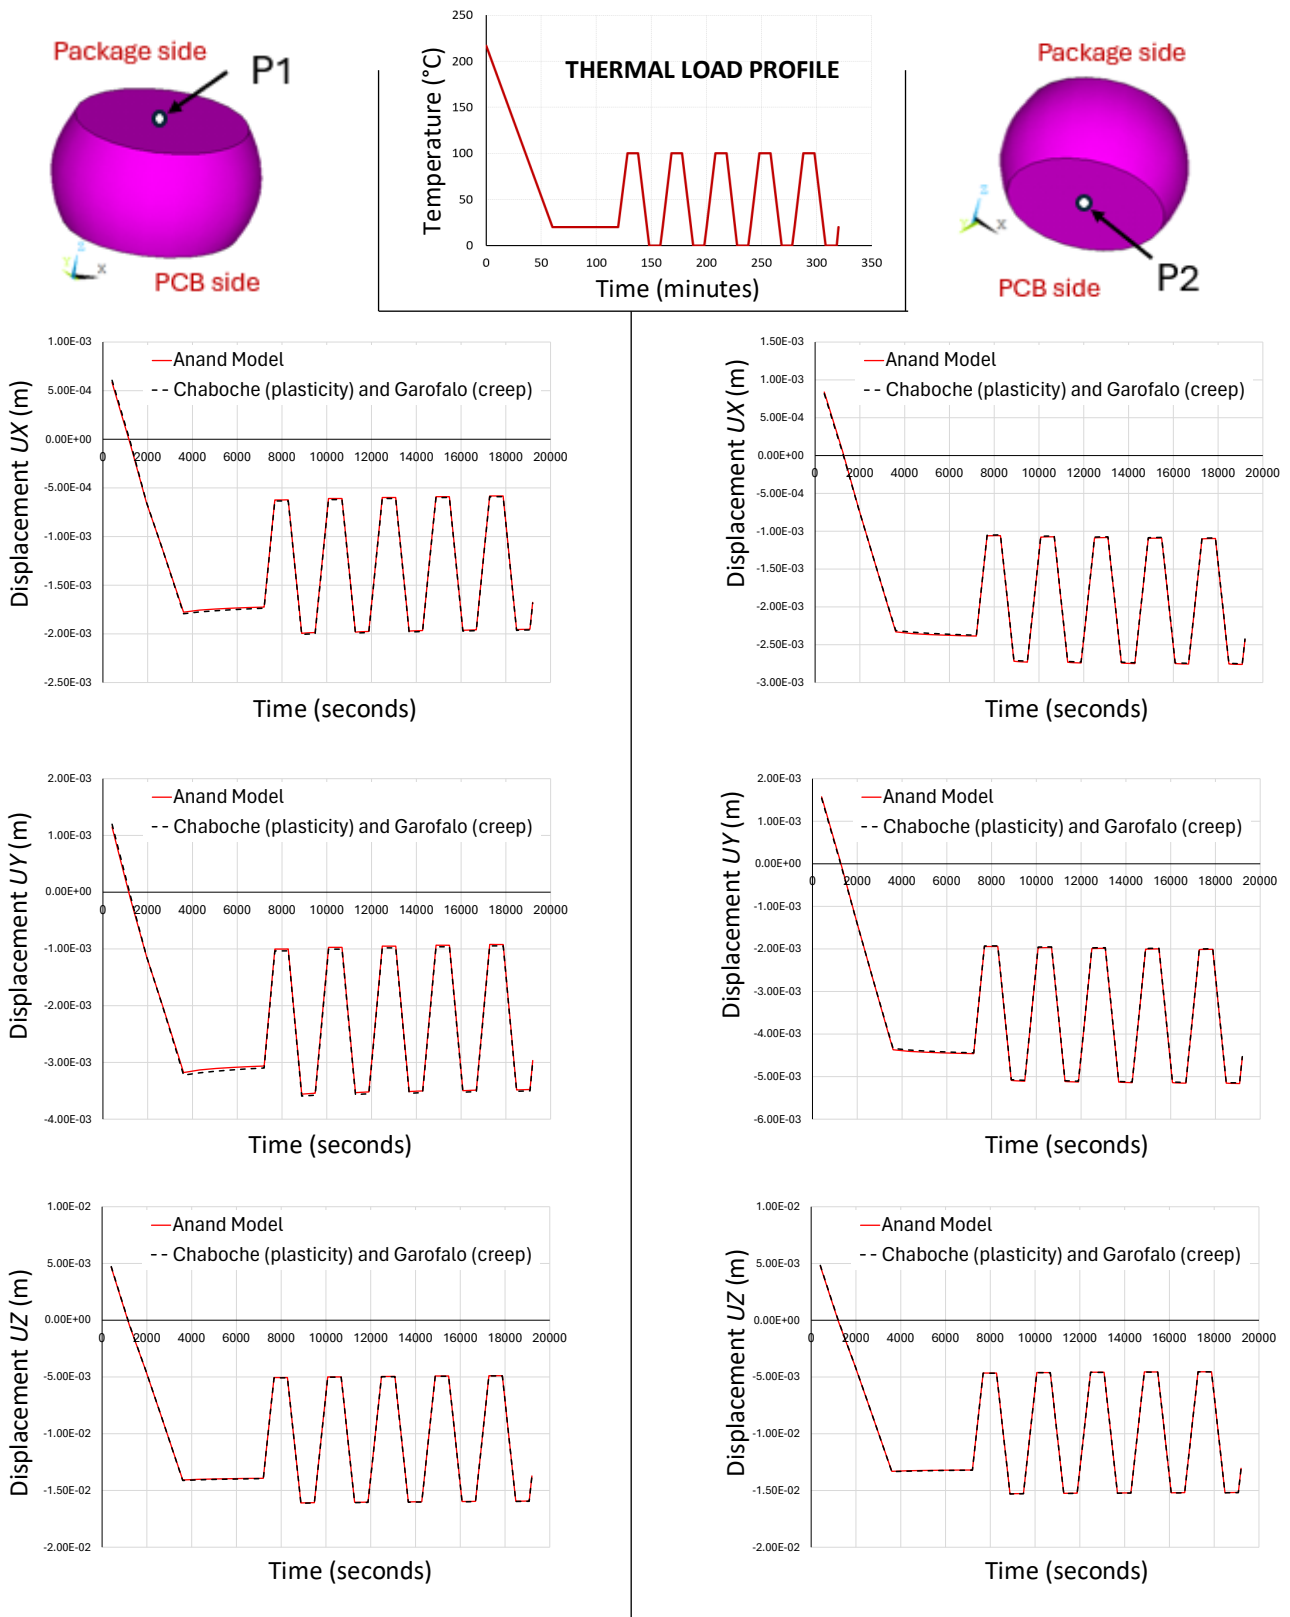

Supplementary Figure 3 Transient displacement results ( $UX$ ,  $UY$  and  $UZ$ ) of the central point at the top interface (P1) and bottom interface (P2) of solder joint M9, predicted under two different setups for the Sn-3.0Ag-0.5Cu material behaviour: (1) Chaboche (kinematic hardening rule) and Garofalo (creep), and (2) Anand viscoplastic model. The top centre graph details the profile of the simulated isothermal load, representing the post-reflow cooldown of the assembly (causing residual stress) followed by five temperature cycles of 0-100°C.

**Parameters used in macro-scale and micro-scale models:**

Supplementary Table 2 Chaboche kinematic hardening model parameters for Sn-3.0Ag-0.5Cu

| Temp [°C] | $\sigma_0$ [MPa] | $C_1$ | $\gamma_1$ | $C_2$ | $\gamma_2$ | $C_2$ | $\gamma_2$ |
|-----------|------------------|-------|------------|-------|------------|-------|------------|
| -40       | 36.46            | 49594 | 5200       | 24330 | 1485       | 984   | 211        |
| 25        | 24.96            | 27809 | 5162       | 13481 | 1476       | 548   | 211        |
| 75        | 19.05            | 18714 | 5140       | 9185  | 1473       | 376   | 210        |
| 125       | 14.64            | 12915 | 5145       | 6502  | 1474       | 268   | 210        |

Supplementary Table 3 Garofalo-Arrhenius creep strain rate model parameters for Sn-3.0Ag-0.5Cu

| Temp [°C] | $A$ [ $s^{-1}$ ] | $B$ [ $MPa^{-1}$ ] | $n$ [-] | $Q/R$ [ $K^{-1}$ ] |
|-----------|------------------|--------------------|---------|--------------------|
| 25        | 31974            |                    |         |                    |
| 75        | 79512            |                    |         |                    |
| 100       | 134720           | 0.02447            | 6.41    | 6498.32            |
| 125       | 213760           |                    |         |                    |

Supplementary Table 4 Key properties used in the CPFEE model.  $\bar{r}_{IMC}$  is the mean radius,  $0.21\mu\text{m}$  in <sup>[1]</sup>, of intermetallic particles embedded within  $\beta$ -Sn in Sn-3Ag-0.5Cu.

| Property   | Unit                              | Symbol              | Value [ $T$ in $^{\circ}\text{C}$ ]                     | Ref. |
|------------|-----------------------------------|---------------------|---------------------------------------------------------|------|
| CTE        | $[^{\circ}\text{C}^{-1}]$         | $a_{11}=a_{22}$     | $14.195 \times 10^{-6} + 25.53 \times 10^{-9} \times T$ | [2]  |
|            |                                   | $a_{33}$            | $28.662 \times 10^{-6} + 56.79 \times 10^{-9} \times T$ |      |
| Elasticity | [GPa]                             | $E_{11}=E_{22}$     | $25.3 - 0.083 \times T$                                 | [3]  |
|            |                                   | $E_{33}$            | $68.3 - 0.072 \times T$                                 |      |
|            |                                   | $G_{12}$            | $24.4 - 0.020 \times T$                                 |      |
|            |                                   | $G_{13}$            | $22.5 - 0.026 \times T$                                 |      |
|            | [-]                               | $\nu_{12}$          | 0.46                                                    |      |
|            |                                   | $\nu_{13}$          | 0.22                                                    |      |
| Plasticity | [MPa]                             | $\tau_{c0}^{(001)}$ | $4.9 - 0.02 \times T$                                   |      |
|            | $[\mu\text{m}^{-2}]$              | $\lambda_1$         | $-260 \times \bar{r}_{IMC} + 1215$                      |      |
|            | $[\mu\text{m}^{-2}\text{s}^{-1}]$ | $\lambda_2$         | $-4.7 \times \bar{r}_{IMC} + 15.2$                      |      |
|            | Multiplicity                      | Slip system         | CRSS ratio                                              |      |
|            | 2                                 | {100}<001>          | 1                                                       | [4]  |
|            | 2                                 | {110}<001>          | 1                                                       |      |
|            | 2                                 | {100}<010>          | 1.05                                                    |      |
|            | 4                                 | {110}<1-11>/2       | 1.1                                                     |      |
|            | 2                                 | {110}<1-10>         | 1.2                                                     |      |
|            | 4                                 | {100}<011>          | 1.25                                                    |      |
|            | 2                                 | {001}<010>          | 1.3                                                     |      |
|            | 2                                 | {001}<110>          | 1.4                                                     |      |
|            | 4                                 | {011}<01-1>         | 1.5                                                     |      |
|            | 8                                 | {211}<01-1>         | 1.5                                                     |      |

### Supplementary references:

- [1] Xu, Y. *et al.* Intermetallic size and morphology effects on creep rate of Sn-3Ag-0.5Cu solder. *International Journal of Plasticity* **137**, 102904, (2021).
- [2] Xian, J. W. *et al.* Anisotropic thermal expansion of  $\text{Ni}_3\text{Sn}_4$ ,  $\text{Ag}_3\text{Sn}$ ,  $\text{Cu}_3\text{Sn}$ ,  $\text{Cu}_6\text{Sn}_5$  and  $\beta\text{Sn}$ . *Intermetallics* **91**, 50-64, (2017).
- [3] Xu, Y. L. *et al.* Multi-scale plasticity homogenization of Sn-3Ag-0.5Cu: From  $\beta$ -Sn micropillars to polycrystals with intermetallics. *Materials Science and Engineering: A* **855**, 143876, (2022).
- [4] Zamiri, A., Bieler, T. R. & Pourboghrat, F. Anisotropic crystal plasticity finite element modeling of the effect of crystal orientation and solder joint geometry on deformation after temperature change. *Journal of Electronic Materials* **38**, 231–240, (2009).
